# Supplementary material for: Genetic and morphological differentiation in Populus nigra L.: isolation by colonization or isolation by adaptation?
Source: PubMed Central journal article supplement (PMC4692097; doi:10.1111/mec.13192), 2015-05-14
Supplement: mec0024-2641-sd1.pdf [file mec0024-2641-sd1.pdf]

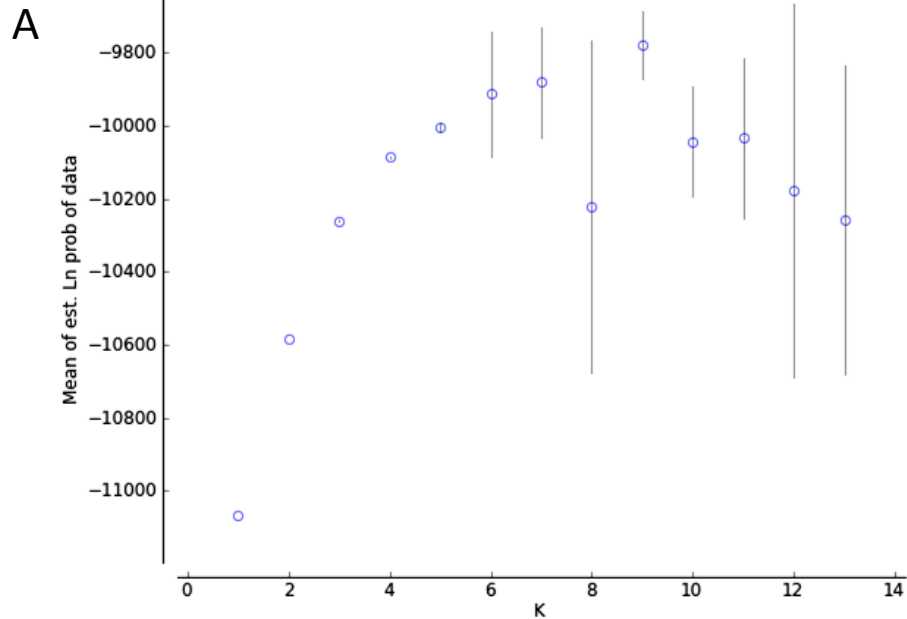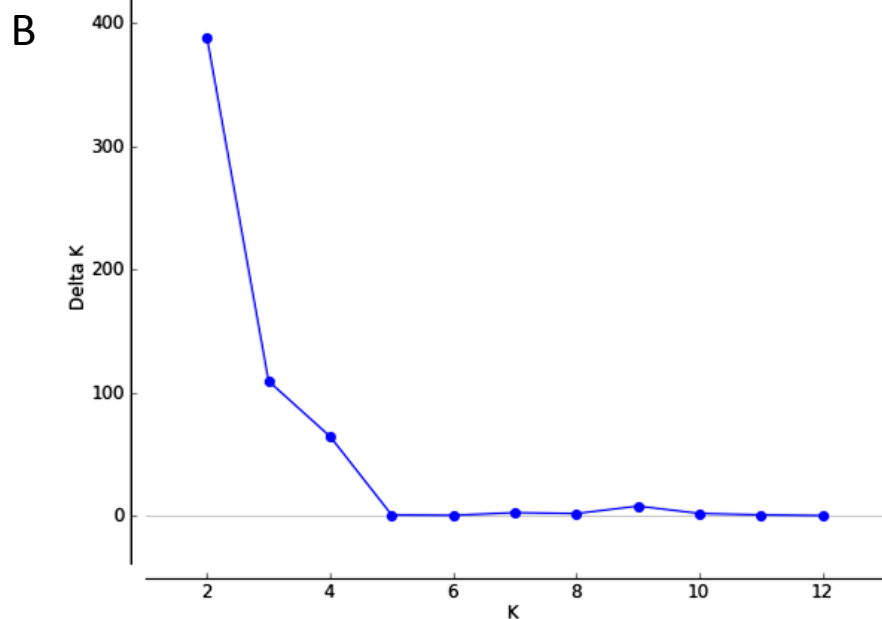

**Supplementary Figure.** Admixutre analyses identify a small number of genetic groups in the collection of *P. nigra* from 13 geographic populations. (A) The observed likelihood values for the set of  $K=\{1:13\}$  genetic groups tested using MCMC simulations. The value where the rate of increase in likelihood diminishes without an increase in variance corresponds to  $K=5$ . (B) The delta-K method of Evanno et al. (2005) indicates two genetic groups to be present.
