# Supplementary material for: Genetic and morphological differentiation in Populus nigra L.: isolation by colonization or isolation by adaptation?
Source: PubMed Central journal article supplement (PMC4692097; doi:10.1111/mec.13192), 2015-05-14
Supplement: mec0024-2641-sd3.pdf [file mec0024-2641-sd3.pdf]

Pairwise correlations among climate variables at 14 sites sampled for *P. nigra*. Significance determined using one-tailed tests.

|                | <b>MAPpt</b> | <b>VarPpt</b> | <b>MaxPpt</b> | <b>MinPpt</b> | <b>MATemp</b> | <b>SDTemp</b> | <b>MaxTemp</b> | <b>MinTemp</b> | <b>MaxDay</b> |
|----------------|--------------|---------------|---------------|---------------|---------------|---------------|----------------|----------------|---------------|
| <b>MAPpt</b>   | ---          | -0.462*       | 0.878***      | 0.881***      | -0.291        | 0.270         | -0.185         | -0.604*        | 0.298         |
| <b>VarPpt</b>  |              | ---           | -0.028        | -0.716**      | 0.803***      | 0.479*        | 0.745**        | 0.429          | -0.653**      |
| <b>MaxPpt</b>  |              |               | ---           | 0.665**       | 0.131         | 0.582*        | 0.205          | -0.411         | 0.003         |
| <b>MinPpt</b>  |              |               |               | ---           | -0.503*       | 0.074         | -0.416         | -0.584*        | 0.513*        |
| <b>MATemp</b>  |              |               |               |               | ---           | 0.524*        | 0.939***       | 0.515*         | -0.885***     |
| <b>SDTemp</b>  |              |               |               |               |               | --            | 0.724**        | -0.405         | -0.490*       |
| <b>MaxTemp</b> |              |               |               |               |               |               | --             | 0.217          | -0.925***     |
| <b>MinTemp</b> |              |               |               |               |               |               |                | ---            | -0.307        |
| <b>MaxDay</b>  |              |               |               |               |               |               |                |                | ---           |

\*\*\* P<0.001

\*\* P<0.01

\* P<0.05

**Per-locus  $F_{ST}$  estimates for nine microsatellite loci examined in 13 populations of *Populus nigra*.**

| <b>Locus</b> | <b><math>F_{ST}</math></b> |
|--------------|----------------------------|
| PMGC_14      | 0.075                      |
| PMGC_486     | 0.062                      |
| PMGC_2088    | 0.088                      |
| PMGC_2163    | 0.063                      |
| PMGC_2818    | 0.069                      |
| PMGC_2879    | 0.044                      |
| WPMS_14      | 0.072                      |
| WPMS_18      | 0.058                      |
| WPMS_20      | 0.118                      |

## Population means (standard errors)

| Population | N    | LA                 | LL          | LW          | LL_LW       | SLA            | Stomata      | SD           | SI               | CA               | CNPL             | Height        | Diameter    |
|------------|------|--------------------|-------------|-------------|-------------|----------------|--------------|--------------|------------------|------------------|------------------|---------------|-------------|
| FR1        | 61.9 | 4474.6<br>(202.8)  | 79.5 (1.9)  | 71.8 (1.9)  | 37.7 (4.9)  | 1081.3 (54.4)  | 22.4 (0.443) | 158.4 (4.4)  | 7.674<br>(0.251) | 6.430<br>(0.054) | 1.451<br>(0.084) | 188.8 (5.07)  | 11.1 (0.48) |
| FR2        | 61.8 | 5827.5<br>(253.2)  | 87.9 (1.8)  | 85.9 (2.3)  | 32.7 (6.9)  | 1323.7 (72.7)  | 23.8 (0.446) | 167.7 (5.0)  | 8.362<br>(0.252) | 6.250<br>(0.053) | 2.123<br>(0.118) | 214.9 (5.53)  | 14.8 (0.60) |
| FR3        | 11.5 | 3905.4<br>(478.4)  | 71.0 (3.8)  | 67.3 (3.6)  | 17.8 (4.7)  | 554.5 (129.1)  | 24.0 (1.731) | 174.0 (16.6) | 8.834<br>(0.680) | 6.315<br>(0.150) | 1.420<br>(0.337) | 157.0 (12.37) | 7.2 (1.22)  |
| FR4        | 24.6 | 4434.3<br>(341.8)  | 73.9 (2.5)  | 73.2 (3.2)  | 28.9 (6.9)  | 864.7 (91.0)   | 24.9 (0.782) | 228.6 (29.4) | 8.367<br>(0.513) | 6.457<br>(0.153) | 1.585<br>(0.290) | 185.6 (9.37)  | 9.1 (0.78)  |
| FR5        | 20.6 | 5709.7<br>(373.4)  | 83.4 (2.5)  | 84.4 (3.1)  | 21.3 (6.4)  | 1240.3 (136.0) | 23.2 (0.840) | 180.8 (9.1)  | 8.158<br>(0.363) | 6.288<br>(0.118) | 1.985<br>(0.199) | 203.0 (11.16) | 12.5 (1.20) |
| GE         | 53.8 | 9405.4<br>(264.9)  | 112.7 (1.7) | 107.0 (1.4) | 20.8 (3.4)  | 2539.4 (64.1)  | 26.8 (0.602) | 196.7 (5.3)  | 9.152<br>(0.256) | 6.213<br>(0.050) | 3.259<br>(0.146) | 253.3 (4.85)  | 20.5 (0.42) |
| IT1        | 61.3 | 12243.6<br>(306.2) | 124.2 (1.8) | 122.9 (1.6) | 10.6 (2.1)  | 2873.0 (61.0)  | 29.2 (0.539) | 216.5 (6.4)  | 9.254<br>(0.278) | 6.081<br>(0.048) | 4.534<br>(0.155) | 283.8 (4.65)  | 21.5 (0.46) |
| IT2        | 43.8 | 12225.5<br>(373.9) | 123.2 (2.1) | 123.0 (2.1) | 10.6 (1.9)  | 2856.5 (83.1)  | 28.3 (0.655) | 227.3 (21.1) | 8.722<br>(0.285) | 6.144<br>(0.073) | 4.526<br>(0.229) | 278.5 (6.68)  | 21.4 (0.50) |
| NE1        | 30.2 | 11506.7<br>(518.4) | 123.7 (2.4) | 116.3 (3.0) | 24.5 (5.4)  | 2805.3 (79.5)  | 26.3 (0.759) | 189.8 (6.6)  | 9.246<br>(0.415) | 6.331<br>(0.077) | 3.655<br>(0.226) | 255.4 (7.02)  | 19.6 (0.61) |
| NE2        | 6.7  | 9886.3<br>(313.8)  | 116.1 (2.8) | 107.5 (1.3) | 18.3 (7.8)  | 2622.3 (100.1) | 27.1 (0.552) | 185.7 (7.2)  | 8.309<br>(0.740) | 6.088<br>(0.229) | 3.834<br>(0.409) | 270.7 (14.15) | 22.1 (1.30) |
| NE3        | 11.9 | 10505.7<br>(591.7) | 118.3 (2.0) | 113.3 (4.0) | 23.5 (10.9) | 2631.6 (129.0) | 26.8 (0.652) | 193.8 (7.6)  | 9.540<br>(0.635) | 5.990<br>(0.080) | 3.886<br>(0.380) | 262.6 (4.20)  | 20.2 (0.73) |
| SP1        | 48.7 | 3212.7<br>(311.1)  | 63.5 (2.4)  | 64.5 (2.4)  | 35.6 (8.4)  | 689.3 (51.0)   | 25.6 (0.701) | 183.5 (7.6)  | 8.834<br>(0.396) | 6.388<br>(0.070) | 1.045<br>(0.133) | 182.7 (6.11)  | 10.4 (0.45) |
| SP2        | 55.4 | 2643.9<br>(163.7)  | 58.8 (1.7)  | 57.9 (1.7)  | 27.0 (5.3)  | 630.4 (45.2)   | 24.4 (0.675) | 174.1 (5.9)  | 9.141<br>(0.296) | 6.380<br>(0.061) | 0.889<br>(0.066) | 163.4 (5.34)  | 9.6 (0.39)  |

N = mean number of samples per trait

LA = leaf area (square mm)

LL = leaf length (mm)

LW = leaf width (mm)

LL\_LW = ratio of leaf length to width ( $\times 10^4$ )

SLA = specific leaf area (mg/sq. mm)

Stomata = number of stomata observed on abaxial leaf surface

SD = abaxial stomatal density (number per sq. mm)

SI = abaxial stomatal index (# stomata / total # epidermal cells)

CA = average area of 10 pavement cells ( $\times 10^4$ , sq. mm)CNPL = calculated number of cells per leaf ( $\times 10^{-7}$ )

Height = Height of ramet, cm

Circum = circumference of ramet (mm)

**Pairwise correlations among 12 morphological traits assessed in a common garden study of *P. nigra*. Significance determined using one-tailed tests.**

|                    | Leaf length | Leaf width | LL:LW     | Specific leaf area | Cell area | Cell number | Stomatal number | Stomatal density | Stomatal index | Height    | Circ.    |
|--------------------|-------------|------------|-----------|--------------------|-----------|-------------|-----------------|------------------|----------------|-----------|----------|
| Leaf area          | 0.962***    | 0.964***   | -0.236*** | 0.913***           | -0.195*** | 0.894***    | 0.363***        | 0.321***         | 0.123**        | 0.736***  | 0.793*** |
| Leaf length        | ---         | 0.938***   | -0.201*** | 0.893***           | -0.200*** | 0.872***    | 0.351***        | 0.316***         | 0.121**        | 0.733***  | 0.790*** |
| Leaf width         |             | ---        | -0.280*** | 0.899***           | -0.209*** | 0.859***    | 0.339***        | 0.277***         | 0.085*         | 0.744***  | 0.815*** |
| Length:width       |             |            | ---       | -0.235***          | -0.206*** | -0.170***   | -0.075          | -0.159**         | -0.161**       | -0.312*** | 0.234*** |
| Specific leaf area |             |            |           | ---                | -0.197*** | 0.836***    | 0.363***        | 0.315***         | 0.144**        | 0.769***  | 0.839*** |
| Cell area          |             |            |           |                    | ---       | -0.404***   | -0.455***       | -0.297***        | -0.090*        | -0.089*   | 0.192*** |
| Cell number        |             |            |           |                    |           | ---         | 0.483***        | 0.449***         | 0.192***       | 0.686***  | 0.732*** |
| Stomatal number    |             |            |           |                    |           |             | ---             | 0.724***         | 0.402***       | 0.282***  | 0.320*** |
| Stomatal density   |             |            |           |                    |           |             |                 | ---              | 0.579***       | 0.300***  | 0.279*** |
| Stomatal index     |             |            |           |                    |           |             |                 |                  | ---            | 0.124**   | 0.110*   |
| Height             |             |            |           |                    |           |             |                 |                  |                | ---       | 0.880*** |
| Circ.              |             |            |           |                    |           |             |                 |                  |                |           | ---      |

\*\*\* P&lt;0.001

\*\* P&lt;0.01

\* P&lt;0.05

**Table 5.** Correlations between genetic (Rousset 1997), morphological (from DFA), and log geographic (km) distances among 13 populations of *P. nigra* tested with simple and partial Mantel tests.

| <b>Comparison</b>                        | <b><i>r</i></b> | <b>P-value</b> |
|------------------------------------------|-----------------|----------------|
| <i>Simple Mantel tests</i>               |                 |                |
| Genetic, Geographic                      | 0.577           | <0.001         |
| Morphological, Genetic                   | 0.476           | <0.001         |
| <i>Partial Mantel tests</i>              |                 |                |
| Genetic, Geographic  Morphological (IBD) | 0.440           | <0.001         |
| Morphological, Genetic Geographic (IBA)  | 0.257           | 0.012          |
